# Supplementary material for: Surgical manual of the Korean Gynecologic Oncology Group: classification of hysterectomy and lymphadenectomy
Source: PubMed Central journal article supplement — J Gynecol Oncol. 2016 Aug 19;28(1):e5. doi: 10.3802/jgo.2017.28.e5 (PMC5165073; doi:10.3802/jgo.2017.28.e5), 2016-08-19
Supplement: jgo-28-e5-s002.pdf [file jgo-28-e5-s002.pdf]

## Pathologic report form for cervical cancer (excision)

### Operation:

- Cold knife conization
- Loop electrosurgical excision procedure (LEEP)
- Other (specify)

### Tumor site: uterine cervix

- Left superior quadrant (12 to 3 o'clock),
- Left inferior quadrant (3 to 6 o'clock)
- Right inferior quadrant (6 to 9 o'clock)
- Right superior quadrant (9 to 12 o'clock)
- Other (specify)

### Histologic type: Microinvasive (T1a1, T1a2) Invasive

- Squamous cell carcinoma
- Adenocarcinoma
  - Endocervical, usual type
  - Mucinous (gastric/intestinal/signet-ring cell)
  - Villoglandular
  - Endometrioid
  - Clear cell
  - Serous
  - Other (specify)
- Other (specify)

### Histologic grade:

- Keratinizing  Non-keratinizing
- G1  G2  G3  Cannot be assessed  Not applicable

### Tumor size:

- Microinvasive
  - Depth: \_\_\_mm
  - Horizontal extent: \_\_\_mm
- Invasive
  - Greatest dimension: \_\_\_cm
  - Additional dimensions (optional): \_\_\_×\_\_\_cm
  - Depth: \_\_\_mm

**Margin:**

(1) Endocervical Margin:

- Not involved: \_\_\_mm free from margin (specify location, if possible)
- Involved by invasive carcinoma/HSIL/LSIL/AIS (specify location, if possible)

(2) Exocervical Margin:

- Not involved: \_\_\_mm free from margin (specify location, if possible)
- Involved by invasive carcinoma/HSIL/LSIL/AIS (specify location, if possible)

(3) Deep Margin:

- Not involved: \_\_\_mm free from margin (specify location, if possible)
- Involved by invasive carcinoma/HSIL/LSIL/AIS (specify location, if possible)

**Vascular/lymphatic invasion:**

- Absent
- Present
- Indeterminate
