# Supplementary material for: Surgical manual of the Korean Gynecologic Oncology Group: classification of hysterectomy and lymphadenectomy
Source: PubMed Central journal article supplement — J Gynecol Oncol. 2016 Aug 19;28(1):e5. doi: 10.3802/jgo.2017.28.e5 (PMC5165073; doi:10.3802/jgo.2017.28.e5), 2016-08-19
Supplement: jgo-28-e5-s003.pdf [file jgo-28-e5-s003.pdf]

## Pathologic report form for cervical cancer (trachelectomy, hysterectomy, pelvic exenteration)

### Operation:

- |                                                                       |                                                                   |
|-----------------------------------------------------------------------|-------------------------------------------------------------------|
| <input type="checkbox"/> Simple trachelectomy                         | <input type="checkbox"/> Radical trachelectomy                    |
| <input type="checkbox"/> Total hysterectomy                           | <input type="checkbox"/> Radical hysterectomy                     |
| <input type="checkbox"/> Pelvic exenteration                          | <input type="checkbox"/> Salpingectomy (right/left/bilateral)     |
| <input type="checkbox"/> Salpingo-oophorectomy (right/left/bilateral) | <input type="checkbox"/> Lymph node sampling/dissection (specify) |
| <input type="checkbox"/> Other (specify)                              |                                                                   |

### Tumor site: uterine cervix

- |                                                                   |                                                                    |
|-------------------------------------------------------------------|--------------------------------------------------------------------|
| <input type="checkbox"/> Left superior quadrant (12 to 3 o'clock) | <input type="checkbox"/> Left inferior quadrant (3 to 6 o'clock)   |
| <input type="checkbox"/> Right inferior quadrant (6 to 9 o'clock) | <input type="checkbox"/> Right superior quadrant (9 to 12 o'clock) |
| <input type="checkbox"/> Other (specify):                         |                                                                    |

### Histologic type: Microinvasive (T1a1, T1a2) Invasive

- |                                                   |                                                                         |
|---------------------------------------------------|-------------------------------------------------------------------------|
| <input type="checkbox"/> Squamous cell carcinoma  |                                                                         |
| <input type="checkbox"/> Adenocarcinoma           |                                                                         |
| <input type="checkbox"/> Endocervical, usual type | <input type="checkbox"/> Mucinous (gastric/intestinal/signet-ring cell) |
| <input type="checkbox"/> Villoglandular           | <input type="checkbox"/> Endometrioid                                   |
| <input type="checkbox"/> Clear cell               | <input type="checkbox"/> Serous                                         |
| <input type="checkbox"/> Other (specify)          |                                                                         |
| <input type="checkbox"/> Other (specify)          |                                                                         |

### Histologic grade:

- |                                       |                                           |                             |                                             |                                         |
|---------------------------------------|-------------------------------------------|-----------------------------|---------------------------------------------|-----------------------------------------|
| <input type="checkbox"/> Keratinizing | <input type="checkbox"/> Non-keratinizing |                             |                                             |                                         |
| <input type="checkbox"/> G1           | <input type="checkbox"/> G2               | <input type="checkbox"/> G3 | <input type="checkbox"/> Cannot be assessed | <input type="checkbox"/> Not applicable |

### Tumor size:

- |                                             |
|---------------------------------------------|
| <input type="checkbox"/> Microinvasive      |
| Depth: ___mm                                |
| Horizontal extent: ___mm                    |
| <input type="checkbox"/> Invasive           |
| Greatest dimension: ___cm                   |
| Additional dimensions (optional): ___×___cm |
| Depth: ___mm                                |

### Distal margin:

- |                                                                                                       |
|-------------------------------------------------------------------------------------------------------|
| <input type="checkbox"/> Not involved: ___mm free from margin (specify location, if possible)         |
| <input type="checkbox"/> Involved by invasive carcinoma/HSIL/LSIL/AIS (specify location, if possible) |

**Endocervical margin: (required in trachelectomy)**

- Not involved: \_\_\_mm free from margin (specify location, if possible)
- Involved by invasive carcinoma/HSIL/LSIL/AIS (specify location, if possible)

**Parametrial invasion:**

- Absent
- Present (right/left/bilateral): \_\_\_\_\_mm free from margin (optional)

**Vascular/lymphatic invasion:**

- Absent                       Present                       Indeterminate

**Other site involvement:**

- Absent
- Present: Uterine corpus/Right ovary/Left ovary/Right salpinx/Left salpinx/Vagina/Urinary bladder/Rectum
- Other (specify)

**Lymph node metastasis:**  Absent     Present

Greatest metastatic tumor dimension: \_\_\_mm

Extranodal extent:  Absent,  Present (\_\_\_mm)

Level 1, external and internal iliac (including obturator): Right (    /    ), Left (    /    )

Level 2, common iliac (including presacral): Right (    /    ), Left (    /    )

Level 3, para-aortic infra-IMA: (    /    )

Level 4, para-aortic infra-renal: (    /    )

Other (specify)
